# Supplementary material for: High-performance electrocatalytic nitrate reduction into ammonia using a chitosan regulated Co nanocatalyst
Source: Royal Society of Chemistry journal article supplement (doi:10.1039/d4qi02058h), 2024-01-01
Supplement: d4qi02058h1.pdf [file d4qi02058h1.pdf]

## Electronic Supplementary Information

### High-performance electrocatalytic nitrate reduction into ammonia by chitosan regulated Co nanocatalyst

Yaqian Xin,<sup>ab</sup> Shengbo Zhang,<sup>\*ab</sup> Jiafang Liu,<sup>ab</sup> Yong Jiang,<sup>c</sup> Yunxia Zhang,<sup>ab</sup>  
Guozhong Wang,<sup>ab</sup> and Haimin Zhang<sup>\*ab</sup>

<sup>a</sup> Key Laboratory of Materials Physics, Centre for Environmental and Energy Nanomaterials, Anhui Key Laboratory of Nanomaterials and Nanotechnology, CAS Center for Excellence in Nanoscience Institute of Solid State Physics, HFIPS, Chinese Academy of Sciences Hefei 230031, PR China

<sup>b</sup> University of Science and Technology of China

<sup>c</sup> Shanghai Synchrotron Radiation Facility, Shanghai Advanced Research Institute, Chinese Academy of Sciences, Shanghai 201800, PR China

\* Corresponding author: E-mail: zhanghm@issp.ac.cn, shbzhang@issp.ac.cn

## Experimental Section

### Chemicals

Chitosan, Cobalt chloride hexahydrate ( $\text{CoCl}_2 \cdot 6\text{H}_2\text{O}$ , AR, 99%),  $\text{K}_2\text{SO}_4$  (AR, 99.0%), NaOH (96.0%), sodium nitroferricyanide(III) dehydrate ( $\text{C}_5\text{FeN}_6\text{Na}_2\text{O} \cdot 2\text{H}_2\text{O}$ , AR, 99.0%), salicylic acid ( $\text{C}_7\text{H}_6\text{O}_3$ , AR, 99.5%), N-(1-naphthyl) ethylenediamine dihydrochloride ( $\text{C}_{10}\text{H}_7\text{NHC}_2\text{H}_4\text{NH}_2 \cdot 2\text{HCl}$ , AR, 95.0%), thiosemicarbazide ( $\text{CH}_5\text{N}_3\text{S}$ , AR, 99.0%), sulfanilamide ( $\text{NH}_2\text{C}_6\text{H}_4\text{SO}_2\text{NH}_2$ , AR, 95.0%),  $^{15}\text{KNO}_3$  (AR),  $(^{15}\text{NH}_4)_2\text{SO}_4$  (AR),  $\text{D}_2\text{O}$ (99.9 atom% D) were all purchased from Shanghai Aladdin Biochemical Technology Co., Ltd. NaClO (AR, 6-14% active chlorine base),  $\text{NH}_4\text{Cl}$  (AR, 99.5%) were purchased from Shanghai Aladdin Bio-Chem Technology Co., Ltd. Sodium citrate ( $\text{C}_6\text{H}_5\text{Na}_3\text{O}_7 \cdot 2\text{H}_2\text{O}$ , AR, 99.0%),  $\text{KNO}_3$  (AR) were purchased from Sinopharm Chemical Reagent Co.,Ltd. The water used for all solutions was purified through a Millipore system (Millipore Corp., 18.2  $\text{M}\Omega$  cm). Commercial carbon paper (CP, HCP030N) was purchased from Shanghai Hesen Electric Co. Ltd. All chemicals were used as received without further purification.

### Synthesis of CC

6.0 g chitosan powder was ground and pyrolyzed at 900 °C for 1 hour under Ar atmosphere with a heating rate of 3 °C  $\text{min}^{-1}$  in a tubular furnace. After cooling to room temperature, wash the dark solid powder with deionized water and ethyl alcohol several times. Finally, the catalyst was collected by centrifugation and dried overnight.

### Synthesis of Co-NPs/CC

6.0 g chitosan powder and 0.25 M  $\text{CoCl}_2 \cdot 6\text{H}_2\text{O}$  were added into 100 mL deionized water with stirring at 80 °C for 12 h to dry the solution into the solid mixture. Then, pyrolyzed in a tubular furnace under Ar atmosphere with a heating rate of 3 °C  $\text{min}^{-1}$  to 900 °C and kept for 1 hour. After cooling down to room temperature, the resulting dark solid powder was collected by centrifugation and then dried in the oven overnight after washing by deionized water and ethyl alcohol for several times.

## Material Characterization

The scanning electron microscopy (SEM) images were obtained using SU8020 (Hitachi, Japan). The transmission electron microscopy (TEM) images were obtained using JEMARM 200F. The aberration-corrected high-angle annular dark-field scanning transmission electron microscopy (HAADF-STEM) measurements and energy-dispersive X-ray (EDX) spectroscopy were performed using JEM-ARM200F. X-ray diffraction (XRD) patterns were acquired using Philips X'pert PRO with Cu K $\alpha$  radiation ( $\lambda = 1.5418 \text{ \AA}$ ) at 40 kV and 40 mA. Nitrogen adsorption-desorption isotherms were measured using Autosorb-iQ-Cx. X-ray photoelectron spectroscopy (XPS) analysis was performed on an ESCALAB 250 X-ray photoelectron spectrometer (Thermo, America). The content of metallic Co was quantitatively determined by ICP-AES (ICP-6300, Thermo Fisher Scientific). *In situ* attenuated total reflection surface-enhanced infrared adsorption spectroscopy (ATR-SEIRAS) measurements were conducted by a Nicolet Nexus FT-IR spectrometer. The synchrotron-based X-ray absorption near-edge structure (XANES) and the extended X-ray absorption fine structure (EXAFS) measurements were performed at the BL05U station of Shanghai Synchrotron Radiation Facility, China.

## Electrochemical measurements

All the electrochemical measurements were performed on a CHI 660E electrochemical workstation (CH Instrumental Corporation, Shanghai, China) using an H-type cell, which was separated by a Nafion 211 proton exchange membrane. The Nafion 211 membrane was treated at 80 °C in H<sub>2</sub>O<sub>2</sub> (5 wt.%) and 0.5 M H<sub>2</sub>SO<sub>4</sub> aqueous solution in turn to protonate and then rinsed with deionized water before use. The catalyst inks were prepared by dispersing 5 mg sample into 500  $\mu\text{L}$  of ethanol, 450  $\mu\text{L}$  of water and 50  $\mu\text{L}$  of Nafion (5 wt.%) under ultrasonic for 30 min, and then were loaded on a carbon paper (1.0 $\times$ 1.0 cm<sup>2</sup>) as the working electrode with 1 mg cm<sup>-2</sup> catalyst. The saturated Ag/AgCl electrode was used as the reference electrode and a platinum mesh was used as the counter electrode. Before use, the

working electrode was activated in 0.1 M K<sub>2</sub>SO<sub>4</sub> +0.1 M KNO<sub>3</sub> solution. Unless otherwise stated, all experiments were performed in 0.1 M K<sub>2</sub>SO<sub>4</sub> +0.1 M KNO<sub>3</sub> solution. All measured potentials versus Ag/AgCl were transformed into the potentials versus reversible hydrogen electrode (RHE) according to the following equation:

$$E_{\text{RHE}}=E_{\text{Ag/AgCl}}+0.059\text{pH}+E^{\circ}_{\text{Ag/AgCl}}$$

where the  $E_{\text{Ag/AgCl}}$  is the equilibrium potential under standard conditions and  $E^{\circ}_{\text{Ag/AgCl}}=0.197\text{V}$  versus RHE at 25°C.

### **Determination of ammonia.**

The concentration of the produced ammonia was detected by the indophenol blue method.<sup>1</sup>In detail, taken 100 μL of electrolyte in a cathode cell after 2 h electrocatalysis, and then added 9900 μL of deionized water in a 15 ml colorimetric tube. Subsequently, 500 μL of coloring agent (composed of 10 g salicylic acid, 10g sodium citrate, 55 ml 2 M sodium hydroxide with deionized water in 200 ml solution), 100 μL of oxidizing solution (containing 5ml sodium hypochlorite and 45ml 2 M sodium hydroxide in 50 ml solution), and 100 μL of catalyst solution (1.0 g Na<sub>2</sub>[Fe(CN)<sub>5</sub>NO]·2H<sub>2</sub>O diluted to 100 mL with deionized water) were added to the measured sample solution in turn. After the color development for 1h at room temperature, the absorbance measurements were performed by UV-Vis spectrophotometer at a wavelength of 697.5 nm. The obtained calibration curve was used to calculate the ammonia concentration.

### **Determination of nitrite.**

The produced nitrite in the electrolyte was detected by the Griess method.<sup>2</sup> In detail, the N-(1-naphthyl) ethylenediamine dihydrochloride (1 g), sulfonamide (20 g) and H<sub>3</sub>PO<sub>4</sub> (50 mL, 85%) were dissolved in 250 ml of deionized water and then set the mixture to 500 ml volumetric flask to form the Griess reagent. Added 1 ml of reacted electrolyte with 9 ml of deionized water into a 15 ml colorimetric tube then mixed with 200 μL of Griess reagent and placed for 20 min at room temperature. UV-vis

spectrophotometer was used to measure the absorbance of the generated nitrite at the wavelength of 540 nm. Then the concentration of  $\text{NO}_2^-$  was obtained by the calibration curve.

### Calculation of NtrRR Performance

$R_{\text{NH}_3}$ , FE and  $S_{\text{NH}_3}$  are calculated by the following formulas:

$$R_{\text{NH}_3}(\mu\text{g h}^{-1} \text{cm}^{-2}) = \frac{C_{\text{NH}_3}(\mu\text{g mL}^{-1}) \times V(\text{mL})}{t(\text{h}) * S(\text{cm}^2)}$$

$$\text{FE}(\%) = \frac{8 \times n_{\text{NH}_3}(\text{mol}) \times F(\text{C mol}^{-1})}{Q(\text{C})} \times 100\%$$

$$S_{\text{NH}_3}(\%) = \frac{C_{\text{NH}_3-\text{N}}}{C_{\text{NO}_2^--\text{N}} + C_{\text{NH}_3-\text{N}}} \times 100\%$$

$C_{\text{NH}_3}$  is the concentration of produced  $\text{NH}_3$  and  $V$  is the volume of electrolyte.  $t$  is the electrolysis time,  $S$  is the area of the loaded electrocatalyst,  $F$  is the faradaic constant ( $96485 \text{ C mol}^{-1}$ ) and  $Q$  is the total charge transferred during electrolysis.  $C_{\text{NH}_3-\text{N}}$  is the concentration of produced  $\text{NH}_3-\text{N}$  and  $C_{\text{NO}_2^--\text{N}}$  is the concentration of produced  $\text{NO}_2^--\text{N}$ .

$R_{\text{NO}_2^-}$  and FE are calculated by the following equations:

$$R_{\text{NO}_2^-}(\mu\text{g h}^{-1} \text{cm}^{-2}) = \frac{C_{\text{NO}_2^-}(\mu\text{g mL}^{-1}) \times V(\text{mL})}{t(\text{h}) * S(\text{cm}^2)}$$

$$\text{FE}(\%) = \frac{2 \times n_{\text{NO}_2^-}(\text{mol}) \times F(\text{C mol}^{-1})}{Q(\text{C})} \times 100\%$$

$C_{\text{NO}_2^-}$  is the measured  $\text{NO}_2^-$  concentration and  $V$  is the volume of electrolyte solution.  $t$  is the electrolysis time,  $S$  is the area of the loaded electrocatalyst,  $F$  is the faradaic constant ( $96485 \text{ C mol}^{-1}$ ) and  $Q$  is the total charge transferred during electrolysis.

### $^{15}\text{N}$ Isotope Labeling Experiments

$^{15}\text{N}$  isotopic labeling experiments were conducted using  $0.1 \text{ M K}_2\text{SO}_4 + 0.1 \text{ M K}^{15}\text{NO}_3$  as the electrolyte with the same experimental procedure of  $0.1 \text{ M K}_2\text{SO}_4 + 0.1 \text{ M KNO}_3$  experiments. The yielded  $^{15}\text{NH}_3$  was measured by the  $^1\text{H}$  NMR methods with  $\text{D}_2\text{O}$  used as an internal standard using Bruker Avance-400 MHz.

### ***In situ* ATR-SEIRAS Spectroscopy Measurement**

The *in situ* ATR-SEIRAS was performed on a Nicolet iS50 FTIR spectrometer (Thermo Scientific) equipped with an MCT-A detector with silicon as the prismatic window and cooled by liquid nitrogen during the electrochemical process. The NtrRR was performed in a three-electrode reactor with the Ag/AgCl and Pt wire used as the reference and counter electrode. The working electrode was prepared by the following method: first, the gold film was deposited on the silicon prismatic surface by chemical deposition, then the catalyst ink was dropped on the surface of the gold film. The spectrum was recorded in the 0.1 M K<sub>2</sub>SO<sub>4</sub> + 0.1 M KNO<sub>3</sub> electrolyte by the potential from -0.7 to -1.2 V *vs* RHE with an interval of 0.1 V. The background spectrum of the catalyst electrode was obtained at an open-circuit voltage before systematic measurement.

### **The online DEMS tests**

The online DEMS tests were performed in 0.1 M K<sub>2</sub>SO<sub>4</sub> + 0.1 M KNO<sub>3</sub> electrolyte solution in a three-electrode reactor with the Ag/AgCl, Pt wire, and the catalyst which dropped on a breathable film with gold plating layer used as the reference, counter, and working electrode, respectively. The potential of -1.0V *vs*. RHE was applied for 1 min after the baseline of the mass spectrometry remained stable. The differential mass signals were recorded when the gaseous products formed on the electrode surface. The next cycle began when the signal returned to baseline, using the same conditions to avoid accidental error. The one cycle lasted 6 min.

## Supplementary Figures and Tables

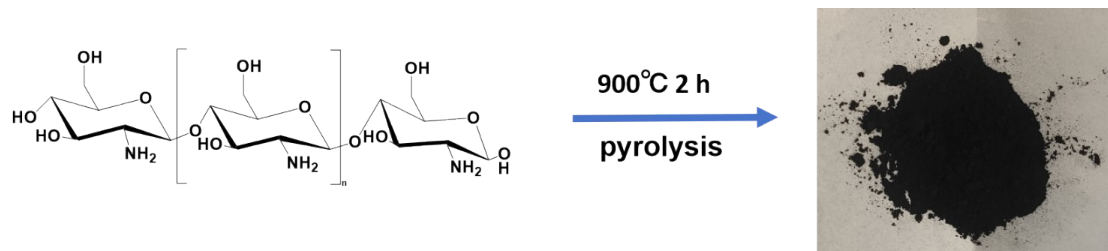

**Fig. S1** Schematic illustration of the synthetic process of CC sample.

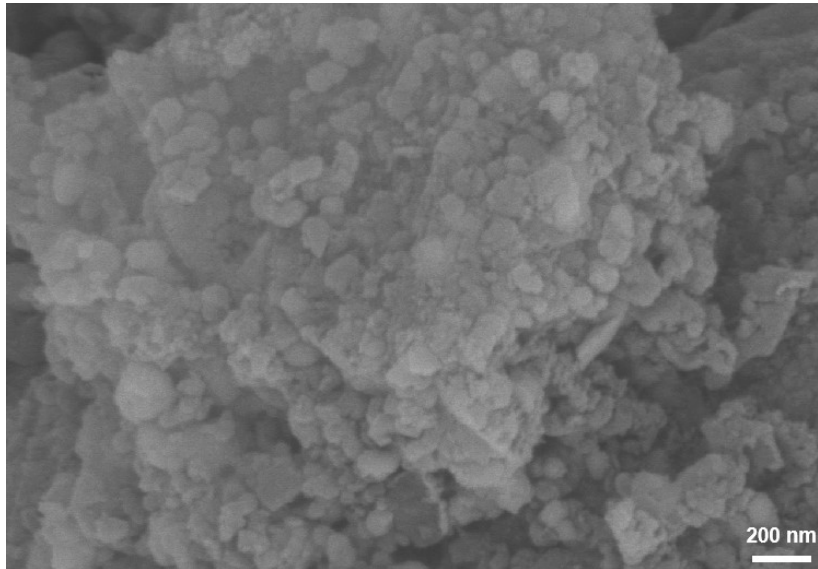

**Fig. S2** SEM image of Co-NPs/CC.



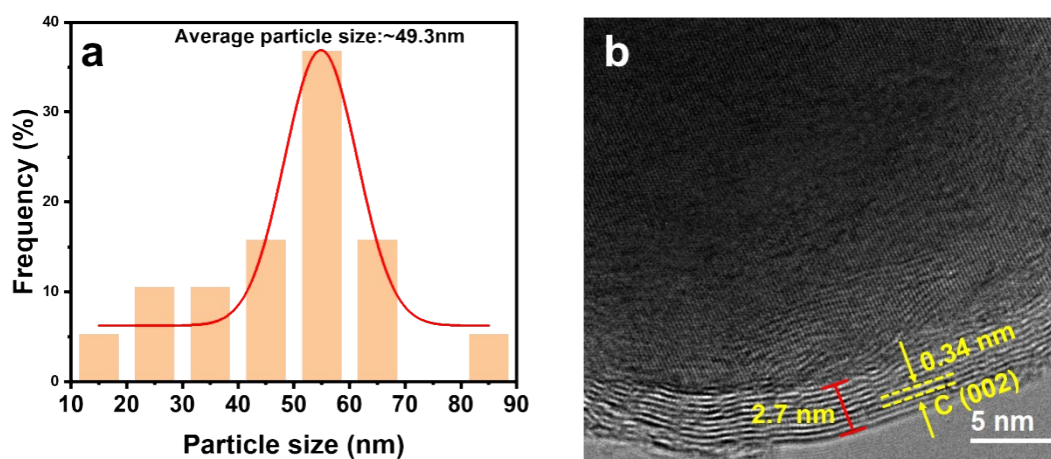

**Fig. S3** (a) The particle sizes of the Co-NPs and (b) the thickness of the carbon layer for the Co-NPs-CC.

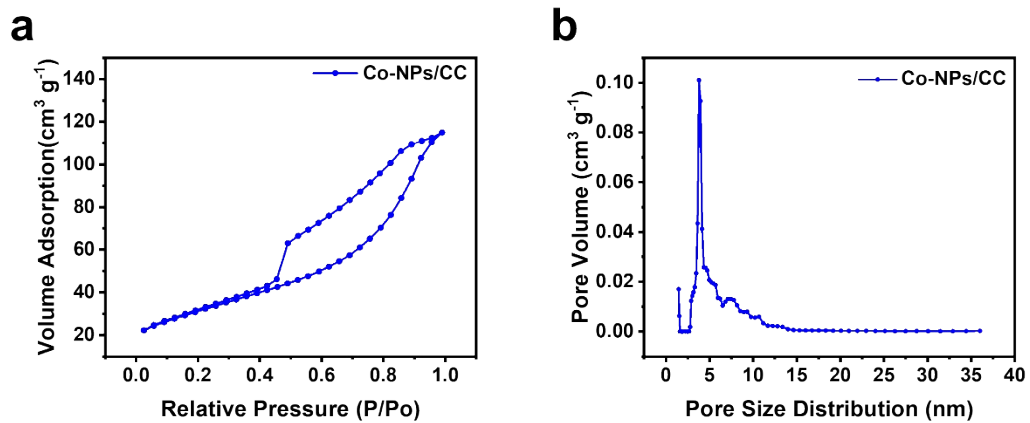

**Fig. S4** (a) Nitrogen adsorption–desorption isotherm curve and (b) Pore size distribution curve of Co-NPs/CC.

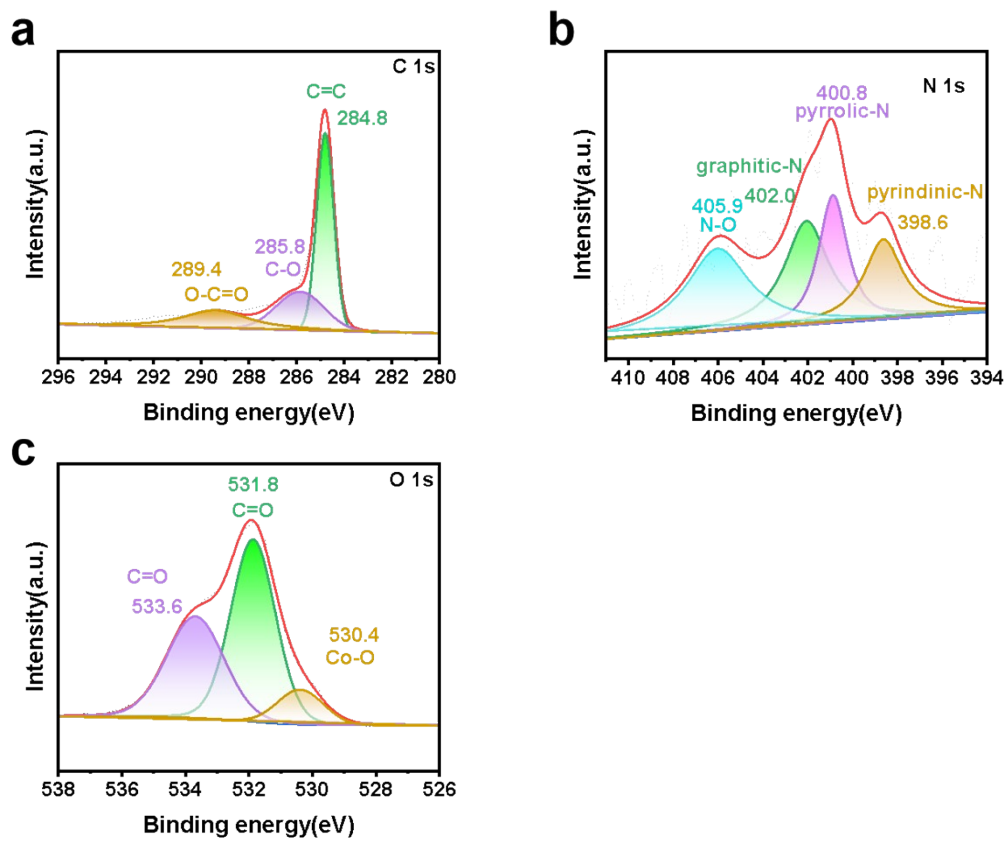

**Fig. S5** High-resolution XPS spectra of **(a)** C 1s, **(b)** N 1s, **(c)** O 1s of Co-NPs/CC

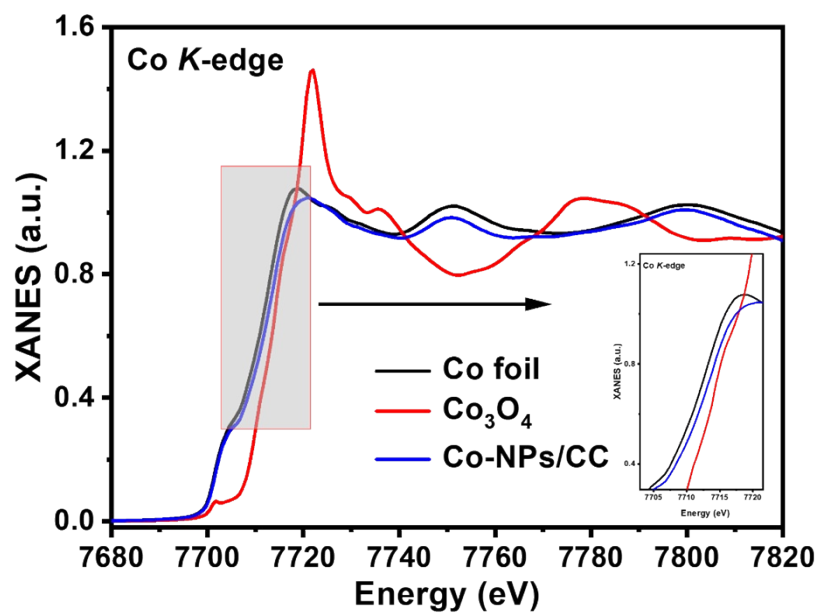

**Fig. S6** Co K-edge XANES spectra and the corresponding partial enlarged view.

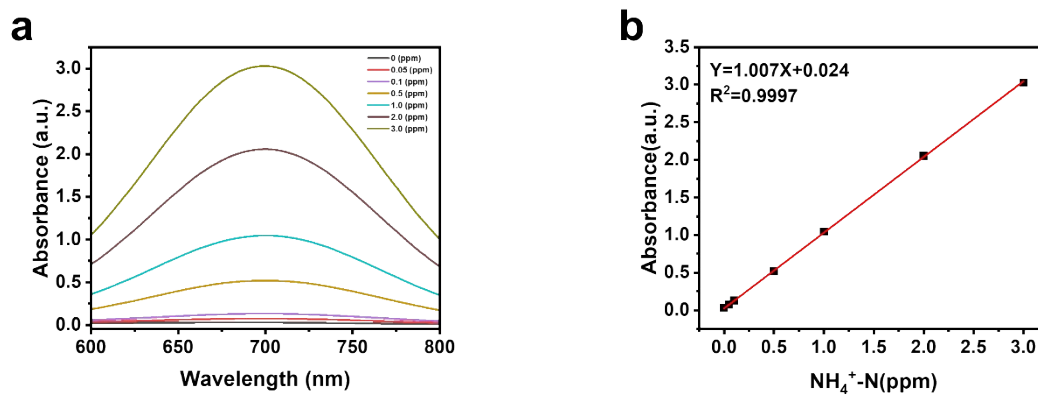

**Fig. S7 (a)** UV-Vis absorption spectra of various  $\text{NH}_4^+\text{-N}$  concentrations (0, 0.05, 0.1, 0.25, 0.5, 1.0, 2.0, 2.5 and 3 ppm). **(b)** The calibration curve used for calculation of  $\text{NH}_4^+\text{-N}$  concentrations.

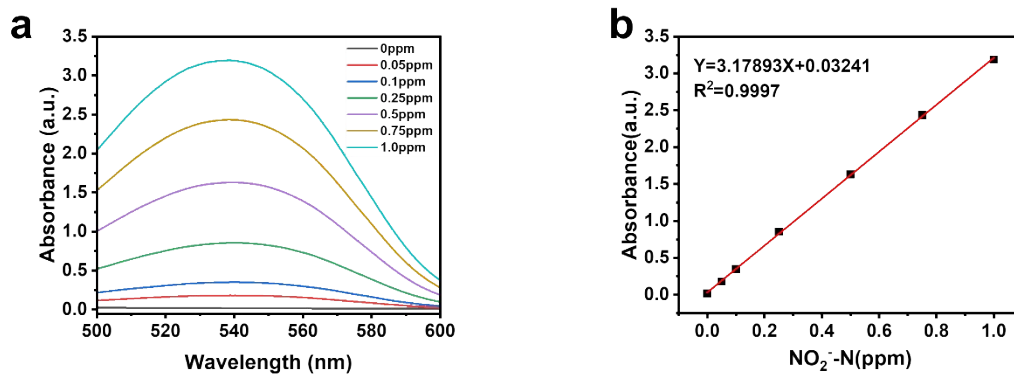

**Fig. S8 (a)** UV-Vis absorption spectra of various  $\text{NO}_2^-$ -N concentrations (0, 0.05, 0.1, 0.25, 0.5, 0.75 and 1.0 ppm). **(b)** The calibration curve used for calculation of  $\text{NO}_2^-$ -N concentrations.

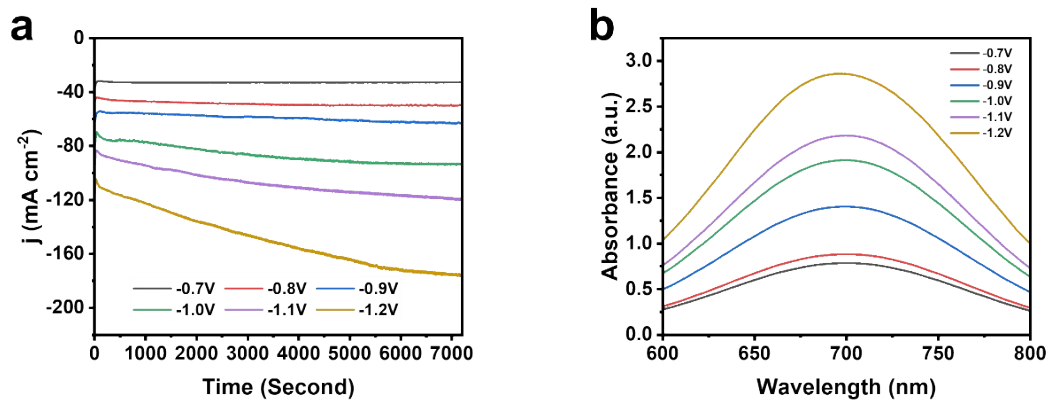

**Fig. S9 (a)** The  $j$ - $t$  curves at different potentials in 0.1 M  $K_2SO_4$  + 0.1M  $KNO_3$  electrolyte over a 2 h period. **(b)** UV-Vis absorption spectra of the corresponding samples.

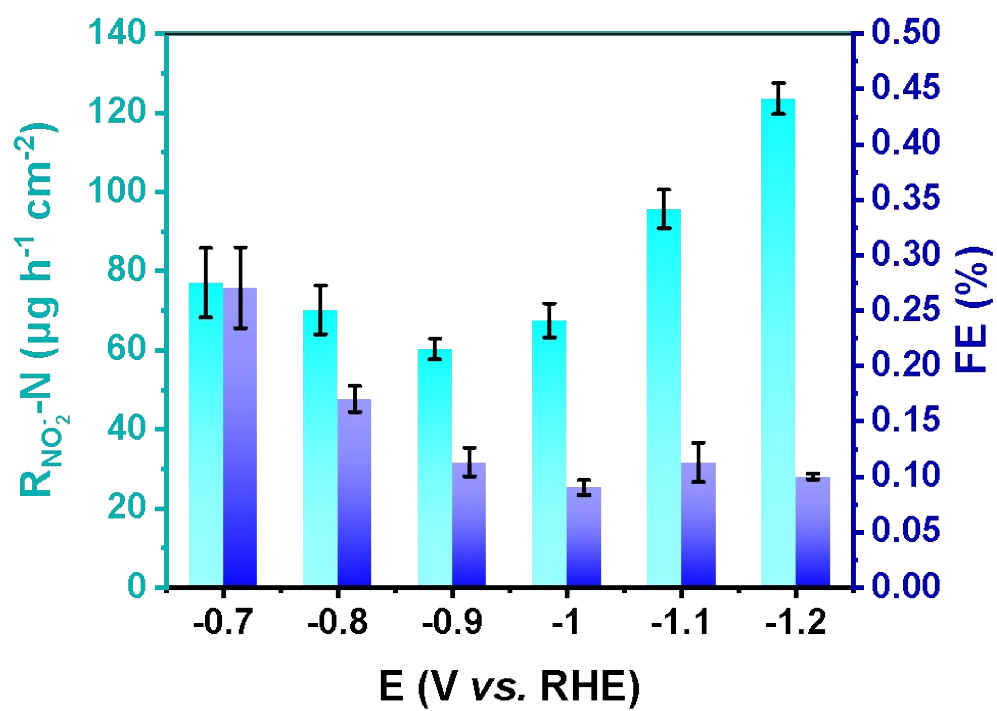

**Fig. S10** The yield  $\text{NO}_2\text{-N}$  and FE of  $\text{NO}_2^-$  in different potentials between  $-0.7$  to  $-1.2$  V (vs. RHE).



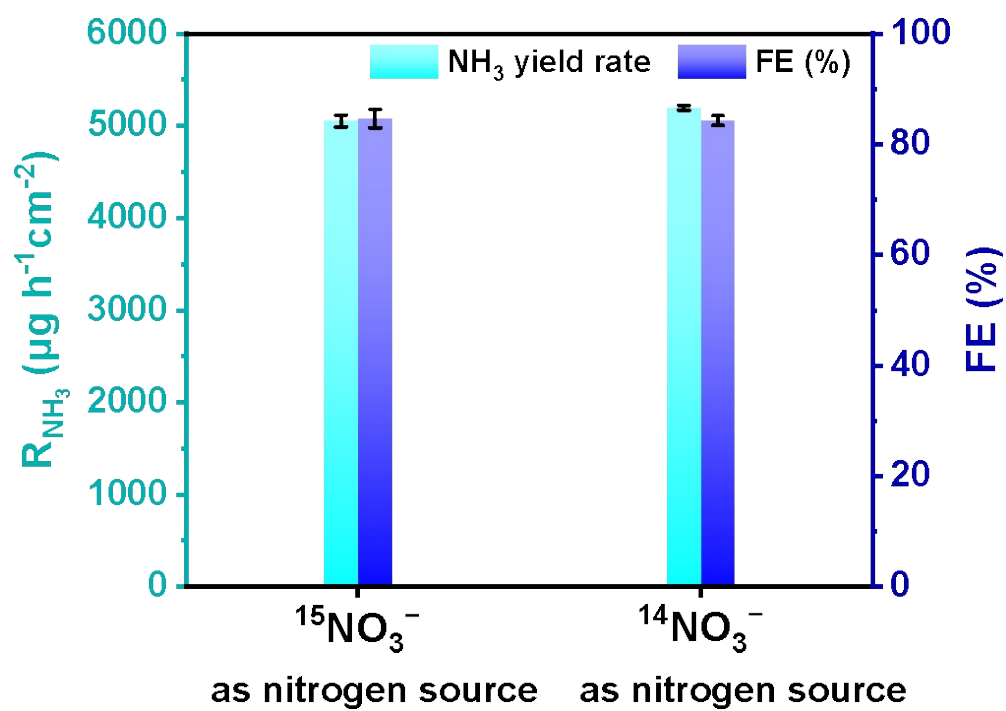

**Fig. S11** Comparison chart of  $R_{\text{NH}_3}$  and FE using  $^{15}\text{NO}_3^-$  and  $^{14}\text{NO}_3^-$  as nitrogen source.

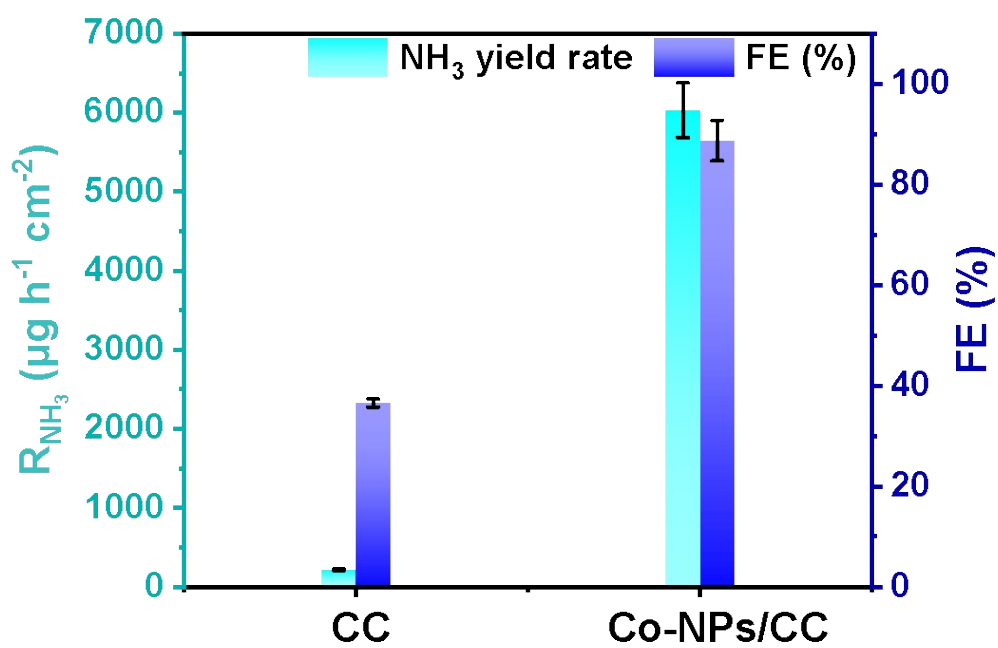

**Fig. S12**  $R_{\text{NH}_3}$  and FE of the electrocatalysts CC and Co-NPs/CC at -1.0 V (vs. RHE) for 2 h.

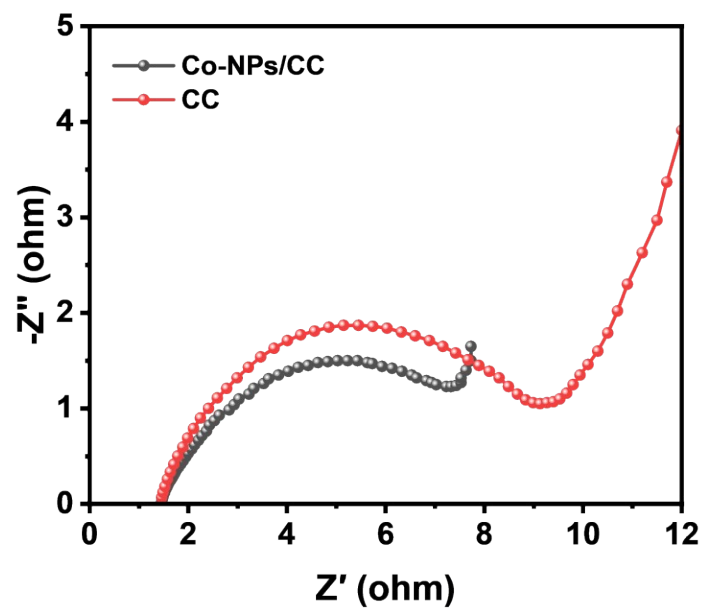

**Fig. S13** The electrochemical impedance spectra of Co-NPs/CC and CC.

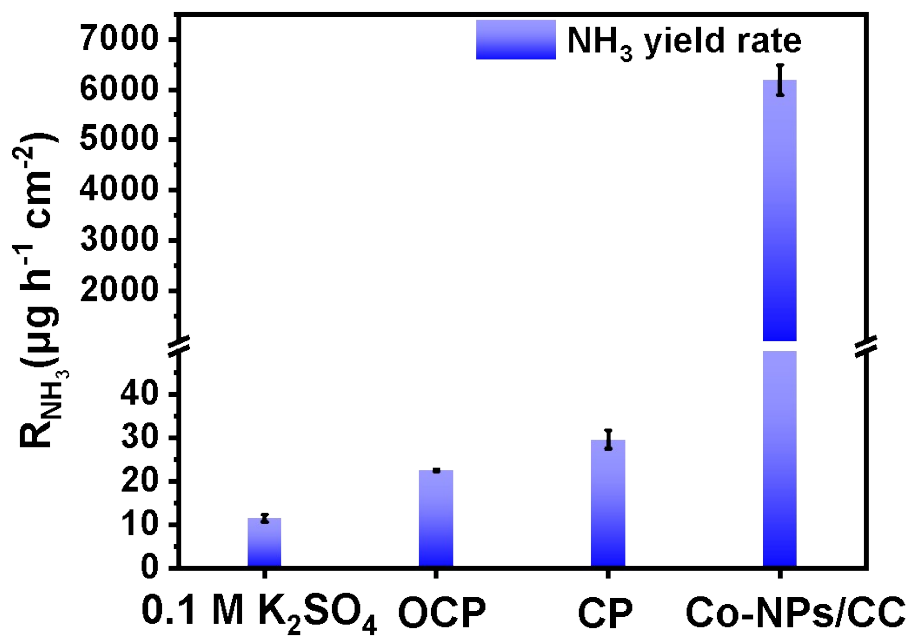

**Fig. S14**  $R_{\text{NH}_3}$  of contrast experiments with different conditions 0.1 M  $\text{K}_2\text{SO}_4$ , OCP, CP and Co-NPs/CC at  $-1.0$  V (vs. RHE) for 2 h.

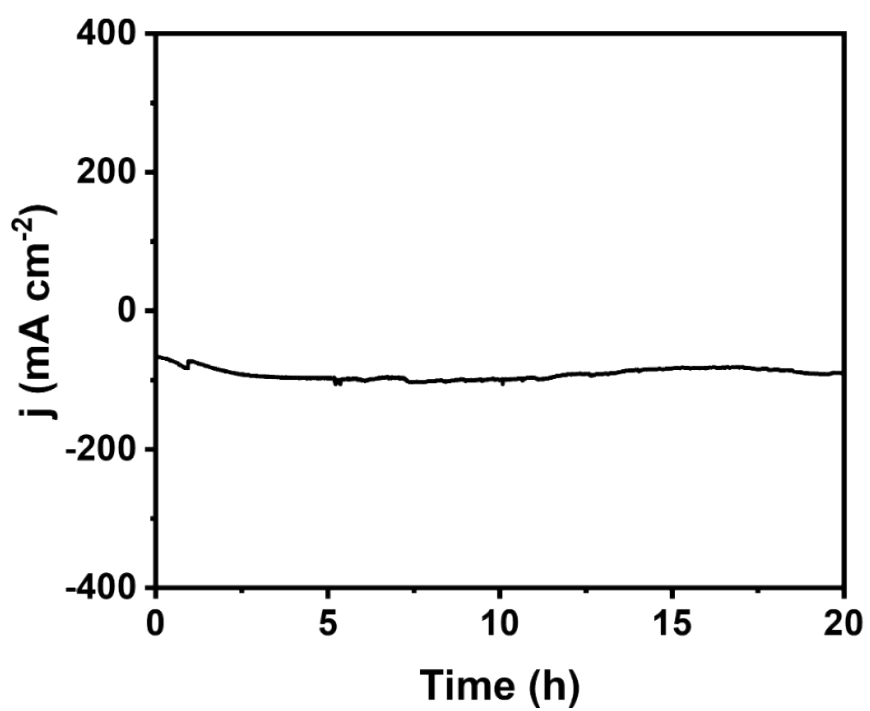

**Fig. R15** The  $j$ - $t$  curve of long-time stability test for 20h at -1.0 V vs. RHE.

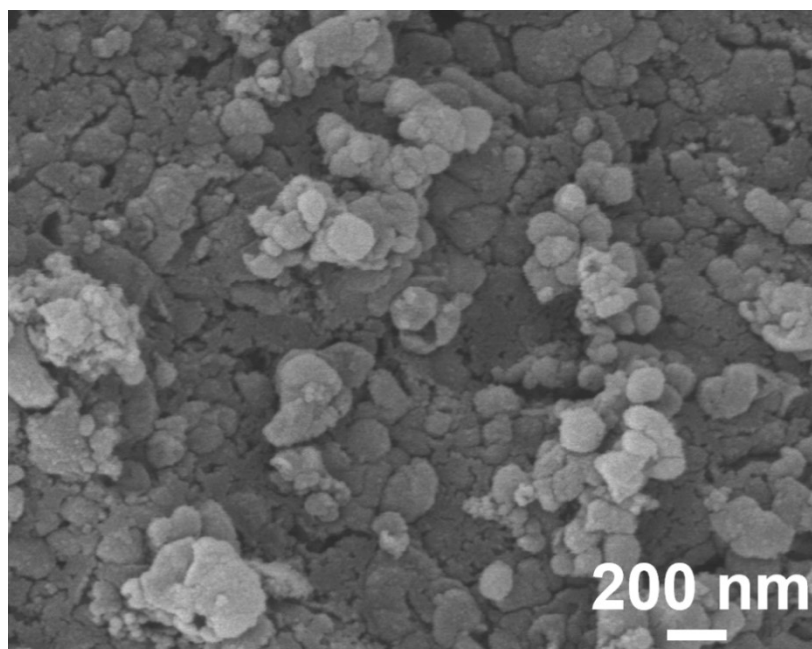

**Fig. S16** SEM image of Co-NPs/CC after 8 NtrRR recycles.

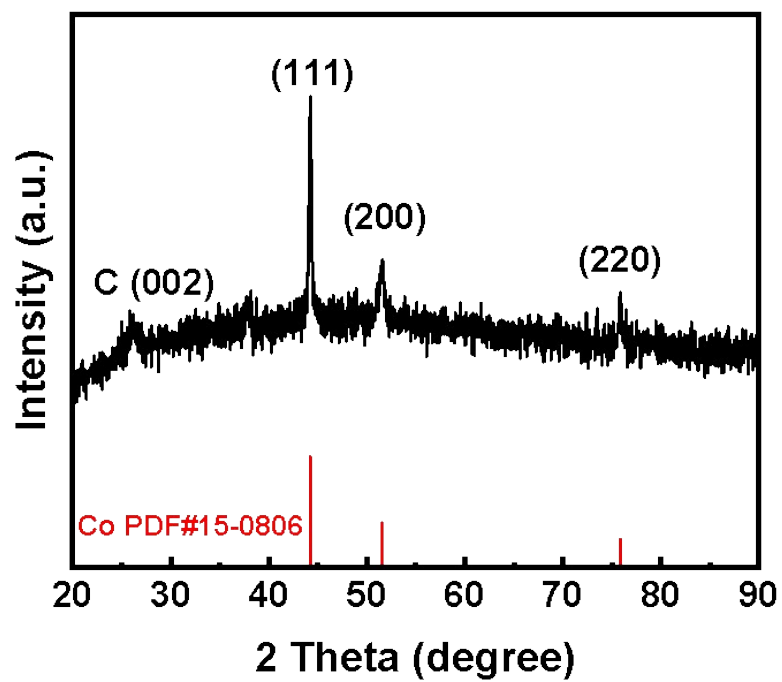

**Fig. S17** XRD patterns of Co-NPs/CC after 8 NtrRR cycles

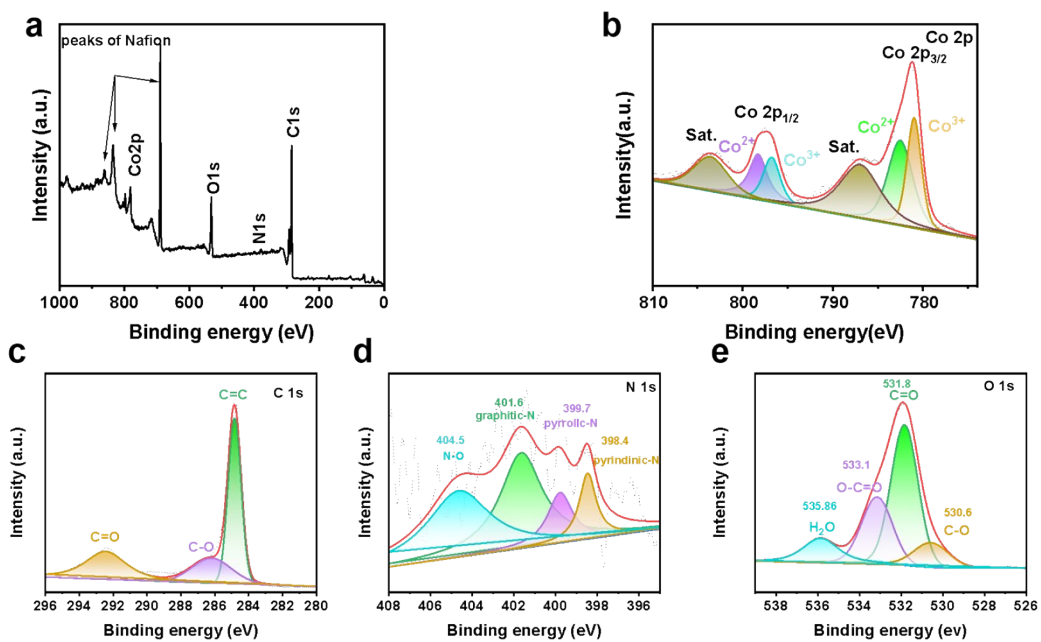

**Fig. S18** (a) Survey XPS spectrum and high-resolution XPS spectra of (b) Co 2p, (c) C 1s, (d) N 1s and (e) O 1s of Co-NPs/CC after 8 NtrRR cycles.



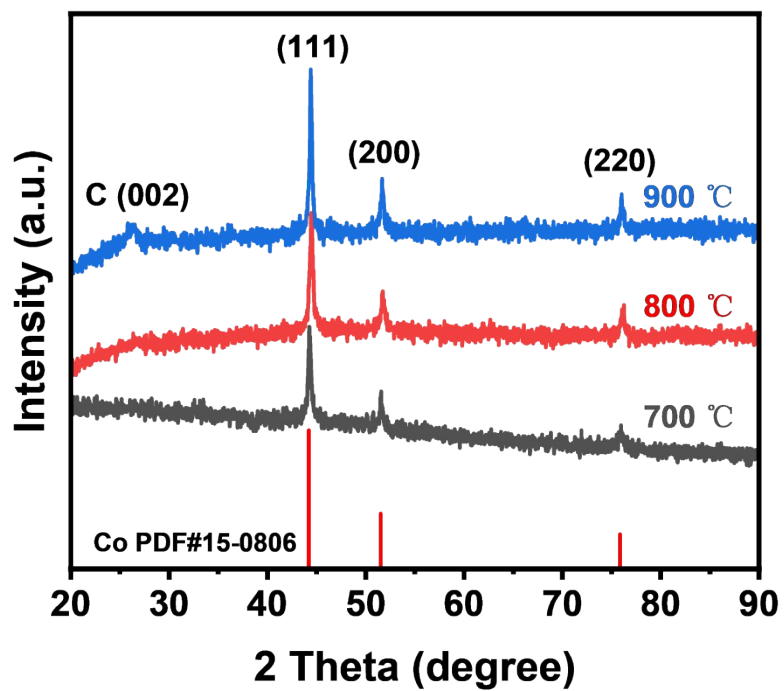

**Fig. S19** XRD pattern of the Co-NPs/CC-700, Co-NPs/CC-800 and Co-NPs/CC-900.

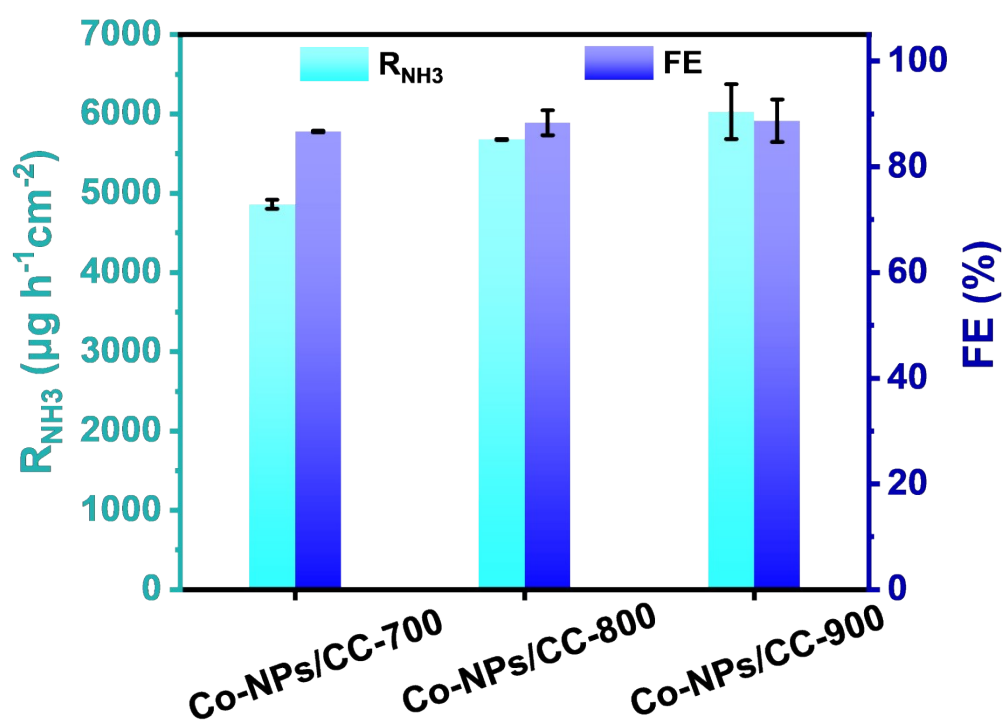

**Fig. S20**  $R_{\text{NH}_3}$  and FE of the electrocatalysts Co-NPs/CC-700, Co-NPs/CC-800 and Co-NPs/CC-900 at -1.0 V (vs. RHE) for 2 h.

**Table S1. Comparison of NtrRR performance between Co-NPs/CC catalyst and others electrocatalysts recently-reported.**

| Catalyst                                                 | Electrolyte                           | NH <sub>3</sub> yield rate<br>$\mu\text{g h}^{-1}\text{cm}^{-2}$ | FE (%)            | Refs. |
|----------------------------------------------------------|---------------------------------------|------------------------------------------------------------------|-------------------|-------|
| Ti                                                       | 0.3 M KNO <sub>3</sub>                | 1850                                                             | 82                | 3     |
|                                                          | 0.1 M HNO <sub>3</sub>                |                                                                  | (-1.0V vs. RHE)   |       |
| Cu <sub>0.65</sub> Pd <sub>0.35</sub> O <sub>x</sub>     | 0.1 M KNO <sub>3</sub>                | 1410                                                             | 74                | 4     |
|                                                          |                                       |                                                                  | (-0.2V vs. RHE)   |       |
| Bi <sub>2</sub> S <sub>3</sub> /MoS <sub>2</sub> /CC     | 0.1 M Na <sub>2</sub> SO <sub>4</sub> | 2550                                                             | 88.4              | 5     |
|                                                          | 0.1 M NaNO <sub>3</sub>               |                                                                  | (-0.8V vs. RHE)   |       |
| Cu-N-C                                                   | 0.1 M KOH                             | 4500                                                             | 84.7              | 6     |
|                                                          | 0.1 M KNO <sub>3</sub>                |                                                                  | (-1.0V vs. RHE)   |       |
| a <sub>1</sub> -Ru-CNTs                                  | 5 mM Cs <sub>2</sub> CO <sub>3</sub>  | 362.75                                                           | 80.6              | 7     |
|                                                          | 500 ppm NaNO <sub>3</sub>             |                                                                  | (-0.2V vs. RHE)   |       |
| Co <sub>3</sub> O <sub>4</sub> /Co                       | 0.1 M K <sub>2</sub> SO <sub>4</sub>  | 4430                                                             | 88.7              | 8     |
|                                                          | 1000 ppm KNO <sub>3</sub>             |                                                                  | (-0.8 V vs. RHE)  |       |
| Fe <sub>3</sub> O <sub>4</sub> @TiO <sub>2</sub> /T<br>P | 0.1 M PBS                             | 12393                                                            | 88.4              | 9     |
|                                                          | 0.1 M NaNO <sub>3</sub>               |                                                                  | (-0.9 V vs. RHE)  |       |
| Pd/NF                                                    | 0.5 M Na <sub>2</sub> SO <sub>4</sub> | 25840                                                            | 78                | 10    |
|                                                          | 0.1 M NaNO <sub>3</sub>               |                                                                  | (-1.4 V vs. RHE)  |       |
| Co-Fe@Fe <sub>2</sub> O <sub>3</sub>                     | 0.1 M Na <sub>2</sub> SO <sub>4</sub> | 880.5                                                            | 85.2              | 11    |
|                                                          | 500 ppm NaNO <sub>3</sub>             |                                                                  | (-0.75V vs. RHE)  |       |
| CuNi-NC                                                  | 0.1M PBS                              | \                                                                | 79.6              | 12    |
|                                                          | 50 ppm NaNO <sub>3</sub>              |                                                                  | (-1.0V vs. RHE)   |       |
| Pd-NDs/Zr-<br>MOF                                        | 0.1M Na <sub>2</sub> SO <sub>4</sub>  | 1870                                                             | 58.1              | 13    |
|                                                          | 500 ppm NO <sub>3</sub>               |                                                                  | (-1.3V vs. RHE)   |       |
| Fe single atom                                           | 0.25 M K <sub>2</sub> SO <sub>4</sub> | 7820                                                             | 75                | 14    |
|                                                          | 0.5 M KNO <sub>3</sub>                |                                                                  | (-0.66 V vs. RHE) |       |
| Fe <sub>2</sub> TiO <sub>5</sub>                         | PBS                                   | 1241                                                             | 87.6              | 15    |

|                                                      |                                      |         |                    |    |
|------------------------------------------------------|--------------------------------------|---------|--------------------|----|
|                                                      | 0.1M NaNO <sub>3</sub>               |         | (-0.9V vs. RHE)    |    |
| CuCo <sub>2</sub> O <sub>4</sub> /CFs                | 1.0 M KOH                            | 2703    | 81.9               | 16 |
|                                                      | 0.1 M KNO <sub>3</sub>               |         | (-0.3 V vs. RHE)   |    |
| Cu <sub>0.68</sub> Ir <sub>0.14</sub> O <sub>z</sub> | 1.0 M KOH                            | 7140    | 87.0               | 17 |
|                                                      | 0.1 M KNO <sub>3</sub>               |         | (0V vs. RHE)       |    |
| Cu <sub>2</sub> O-Cu                                 | 1 M KOH                              | 2170    | 84.38              | 18 |
|                                                      | 250 ppm NaNO <sub>3</sub>            |         | (-0.25 V vs. RHE)  |    |
| SmCO <sub>3</sub>                                    | 0.1 M PBS                            | 1440    | 81.3               | 19 |
|                                                      | 0.1 M NaNO <sub>3</sub>              |         | (-1.0V vs. RHE)    |    |
| Cu <sub>SA</sub> NPC                                 | 0.01 M PBS                           | 2602    | 87.2               | 20 |
|                                                      | 0.1 ppm NaNO <sub>3</sub>            |         | (-1.1 V vs. RHE)   |    |
| Ni <sub>2</sub> P@Cu <sub>3</sub> P                  | 0.5 M K <sub>2</sub> SO <sub>4</sub> | 4732.8  | 96.97              | 21 |
|                                                      | 200ppm KNO <sub>3</sub> -N           |         | (-00.49 V vs. RHE) |    |
| This work                                            | 0.1 M K <sub>2</sub> SO <sub>4</sub> | 9181.72 | 88.71 ± 4.02%      |    |
|                                                      | 0.1 M KNO <sub>3</sub>               | ± 60.88 | (-1.0V vs. RHE)    |    |

## Reference

1. D. Zhu, L. Zhang, R. E. Ruther and R. J. Hamers, Photo-illuminated diamond as a solid-state source of solvated electrons in water for nitrogen reduction, *Nat. Mater.*, 2013, **12**, 836-841.
2. P. Li, Z. Jin, Z. Fang and G. Yu, A single-site iron catalyst with preoccupied active centers that achieves selective ammonia electrosynthesis from nitrate, *Energy Environ. Sci.*, 2021, **14**, 3522-3531.
3. J. M. McEnaney, S. J. Blair, A. C. Nielander, J. A. Schwalbe, D. M. Koshy, M. Cargnello and T. F. Jaramillo, Electrolyte engineering for efficient electrochemical nitrate reduction to ammonia on a titanium electrode, *ACS Sustainable Chem. Eng.*, 2020, **8**, 2672-2681.
4. W. Jung, J. Jeong, Y. Chae, W. H. Lee, Y.-J. Ko, K. H. Chae, H.-s. Oh, U. Lee, D. K. Lee, B. K. Min, H. Shin, Y. J. Hwang and D. H. Won, Synergistic bimetallic CuPd oxide alloy electrocatalyst for ammonia production from the electrochemical nitrate reaction, *J. Mater. Chem. A*, 2022, **10**, 23760-23769.
5. X. Liu, X. Xu, F. Li, J. Xu, H. Ma, X. Sun, D. Wu, C. Zhang, X. Ren and Q. Wei, Heterostructured Bi<sub>2</sub>S<sub>3</sub>/MoS<sub>2</sub> nanoarrays for efficient electrocatalytic nitrate reduction to ammonia under ambient conditions, *ACS Appl. Mater. Interfaces*, 2022, **14**, 38835-38843.
6. J. Yang, H. Qi, A. Li, X. Liu, X. Yang, S. Zhang, Q. Zhao, Q. Jiang, Y. Su, L. Zhang, J.-F. Li, Z.-Q. Tian, W. Liu, A. Wang and T. Zhang, Potential-driven restructuring of Cu single atoms to nanoparticles for boosting the electrochemical reduction of nitrate to ammonia, *J. Am. Chem. Soc.*, 2022, **144**, 12062-12071.
7. M. Jiang, A. Tao, Y. Hu, L. Wang, K. Zhang, X. Song, W. Yan, Z. Tie and Z. Jin, Crystalline modulation engineering of Ru nanoclusters for boosting ammonia electrosynthesis from dinitrogen or nitrate, *ACS Appl. Mater. Interfaces*, 2022, **14**, 17470-17478.
8. F. Zhao, G. Hai, X. Li, Z. Jiang and H. Wang, Enhanced electrocatalytic nitrate reduction to ammonia on cobalt oxide nanosheets via multiscale defect

- modulation, *Chem. Eng. J.*, 2023, **461**, 141960.
9. X. He, J. Li, R. Li, D. Zhao, L. Zhang, X. Ji, X. Fan, J. Chen, Y. Wang, Y. Luo, D. Zheng, L. Xie, S. Sun, Z. Cai, Q. Liu, K. Ma and X. Sun, Ambient ammonia synthesis via nitrate electroreduction in neutral media on Fe<sub>3</sub>O<sub>4</sub> nanoparticles-decorated TiO<sub>2</sub> nanoribbon array, *Inorg. Chem.*, 2022, **62**, 25-29.
  10. H. Guo, M. Li, Y. Yang, R. Luo, W. Liu, F. Zhang, C. Tang, G. Yang and Y. Zhou, Self-supported Pd nanorod arrays for high-efficient nitrate electroreduction to ammonia, *Small*, 2023, **19**, 2207743.
  11. S. Zhang, M. Li, J. Li, Q. Song and X. Liu, High-ammonia selective metal-organic framework-derived Co-doped Fe/Fe<sub>2</sub>O<sub>3</sub> catalysts for electrochemical nitrate reduction, *Proc. Natl. Acad. Sci. U.S.A*, 2022, **119**, e2115504119.
  12. Y. Liu, B. Deng, K. Li, H. Wang, Y. Sun and F. Dong, Metal-organic framework derived carbon-supported bimetallic copper-nickel alloy electrocatalysts for highly selective nitrate reduction to ammonia, *J. Colloid Interface Sci.*, 2022, **614**, 405-414.
  13. M. Jiang, J. Su, X. Song, P. Zhang, M. Zhu, L. Qin, Z. Tie, J.-L. Zuo and Z. Jin, Interfacial reduction nucleation of noble metal nanodots on redox-active metal-organic frameworks for high-efficiency electrocatalytic conversion of nitrate to ammonia, *Nano Lett.*, 2022, **22**, 2529-2537.
  14. Z.-Y. Wu, M. Karamad, X. Yong, Q. Huang, D. A. Cullen, P. Zhu, C. Xia, Q. Xiao, M. Shakouri, F.-Y. Chen, J. Y. Kim, Y. Xia, K. Heck, Y. Hu, M. S. Wong, Q. Li, I. Gates, S. Siahrostami and H. Wang, Electrochemical ammonia synthesis via nitrate reduction on Fe single atom catalyst, *Nat. Commun.*, 2021, **12**, 2807.
  15. H. Du, H. Guo, K. Wang, X. Du, B. A. Beshiwork, S. Sun, Y. Luo, Q. Liu, T. Li and X. Sun, Durable electrocatalytic reduction of nitrate to ammonia over defective pseudobrookite Fe<sub>2</sub>TiO<sub>5</sub> nanofibers with abundant oxygen vacancies, *Angew. Chem. Int. Ed.*, 2022, **62**, e202215782.
  16. Z. Niu, S. Fan, X. Li, P. Wang, Z. Liu, J. Wang, C. Bai and D. Zhang, Bifunctional copper-cobalt spinel electrocatalysts for efficient tandem-like nitrate reduction to ammonia, *Chem. Eng. J.*, 2022, **450**, 138343.

17. M. A. Akram, B. Zhu, J. Cai, S. Qin, X. Hou, P. Jin, F. Wang, Y. He, X. Li and L. Feng, Hierarchical nanospheres with polycrystalline Ir&Cu and amorphous Cu<sub>2</sub>O toward energy-efficient nitrate electrolysis to ammonia, *Small*, 2023, **19**, 2206966.
18. W. Fu, Z. Hu, Y. Zheng, P. Su, Q. Zhang, Y. Jiao and M. Zhou, Tuning mobility of intermediate and electron transfer to enhance electrochemical reduction of nitrate to ammonia on Cu<sub>2</sub>O/Cu interface, *Chem. Eng. J.*, 2022, **433**, 133680.
19. P. Hu, S. Hu, H. Du, Q. Liu, H. Guo, K. Ma and T. Li, Efficient electrocatalytic reduction of nitrate to ammonia over fibrous SmCoO<sub>3</sub> under ambient conditions, *Chem. Commun.*, 2023, **59**, 5697-5700.
20. X. Zhao, Q. Geng, F. Dong, K. Zhao, S. Chen, H. Yu and X. Quan, Boosting the selectivity and efficiency of nitrate reduction to ammonia with a single-atom Cu electrocatalyst, *Chem. Eng. J.*, 2023, **466**, 143314.
21. S. Lv, F. Gou, H. Wang, Y. Jiang, W. Shen, R. He and M. Li, Interface coupling of Ni<sub>2</sub>P@Cu<sub>3</sub>P catalyst to facilitate highly-efficient electrochemical reduction of nitrate to ammonia, *Appl. Surf. Sci.*, 2024, **648**, 159082.
